# Supplementary material for: Immune microenvironment of basal cell carcinoma and tumor regression following combined PD-1/LAG-3 blockade
Source: PubMed Central journal article supplement — J Immunother Cancer. 2023 Dec 14;11(12):e007463. doi: 10.1136/jitc-2023-007463 (PMC10729066; doi:10.1136/jitc-2023-007463), 2023-12-14
Supplement: jitc-2023-007463supp001.pdf [file jitc-2023-007463supp001.pdf]

**Supplemental Table S1. Clinicopathologic features of archival, histologically aggressive BCCs.**

| Characteristic                       | Patients (n=34) |
|--------------------------------------|-----------------|
| <b>Age, years</b>                    |                 |
| Median (range)                       | 66 (45-96)      |
| <b>Sex, n (%)</b>                    |                 |
| Male                                 | 27 (79%)        |
| Female                               | 7 (21%)         |
| <b>Size, n (%)</b>                   |                 |
| < 1 cm Head and Neck                 | 2 (5.9%)        |
| ≥ 1cm Head and Neck                  | 25 (73.5%)      |
| < 2 cm Trunk/Extremity               | 3 (8.8%)        |
| ≥2 cm Trunk/Extremity                | 4 (11.8%)       |
| <b>Location, n (%)</b>               |                 |
| Head and Neck                        | 27 (79%)        |
| Trunk/Extremity                      | 7 (21%)         |
| <b>Perineural invasion, n (%)</b>    |                 |
| Yes                                  | 20 (59%)        |
| No                                   | 14 (41%)        |
| <b>Invading bone, n (%)</b>          |                 |
| Yes                                  | 3 (9%)          |
| No                                   | 31 (91%)        |
| <b>Recurred locally, n (%)</b>       |                 |
| Yes                                  | 8 (23.5%)       |
| No                                   | 21 (61.8%)      |
| N/A                                  | 5 (14.7%)       |
| <b>Metastasis, n (%)</b>             |                 |
| Yes                                  | 4 (11.8%)       |
| No                                   | 25 (73.5%)      |
| N/A                                  | 5 (14.7%)       |
| <b>Prior systemic therapy, n (%)</b> |                 |
| No                                   | 30 (88%)        |
| Yes (vismodegib)                     | 4 (12%)         |

## Supplemental Figure S1.

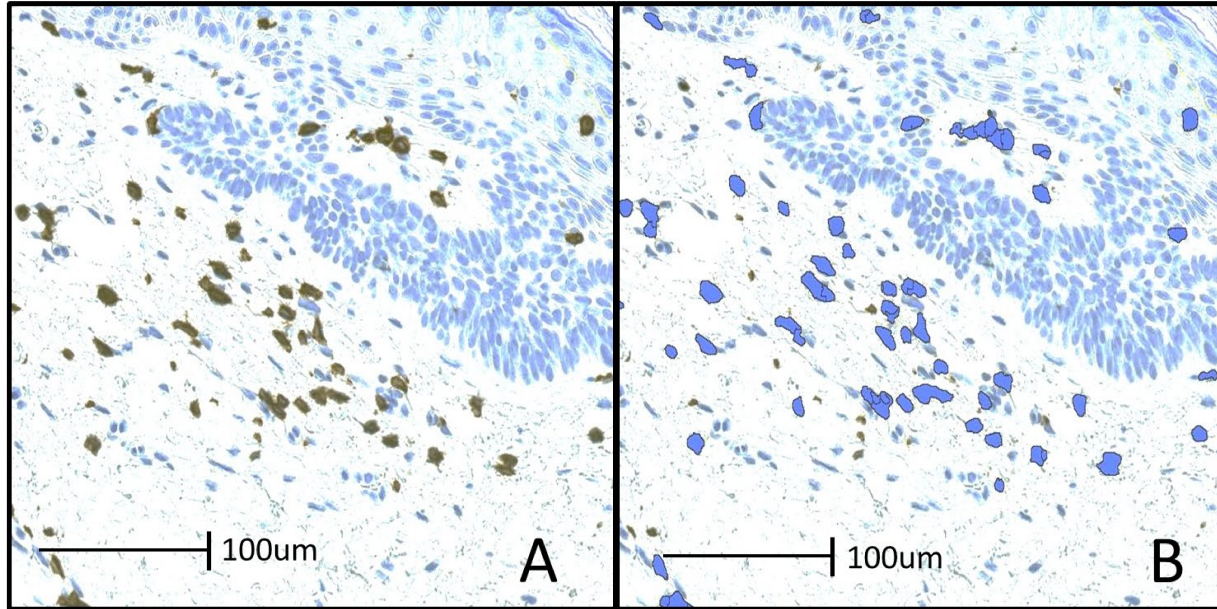

**Figure S1. Computer assisted quantification of IHC markers. (A)** IHC for CD3 (brown chromogen) **(B)** quantification of IHC staining in blue (algorithm counts all positive cells with a nucleus in the field of interest).

## Supplemental Figure S2.

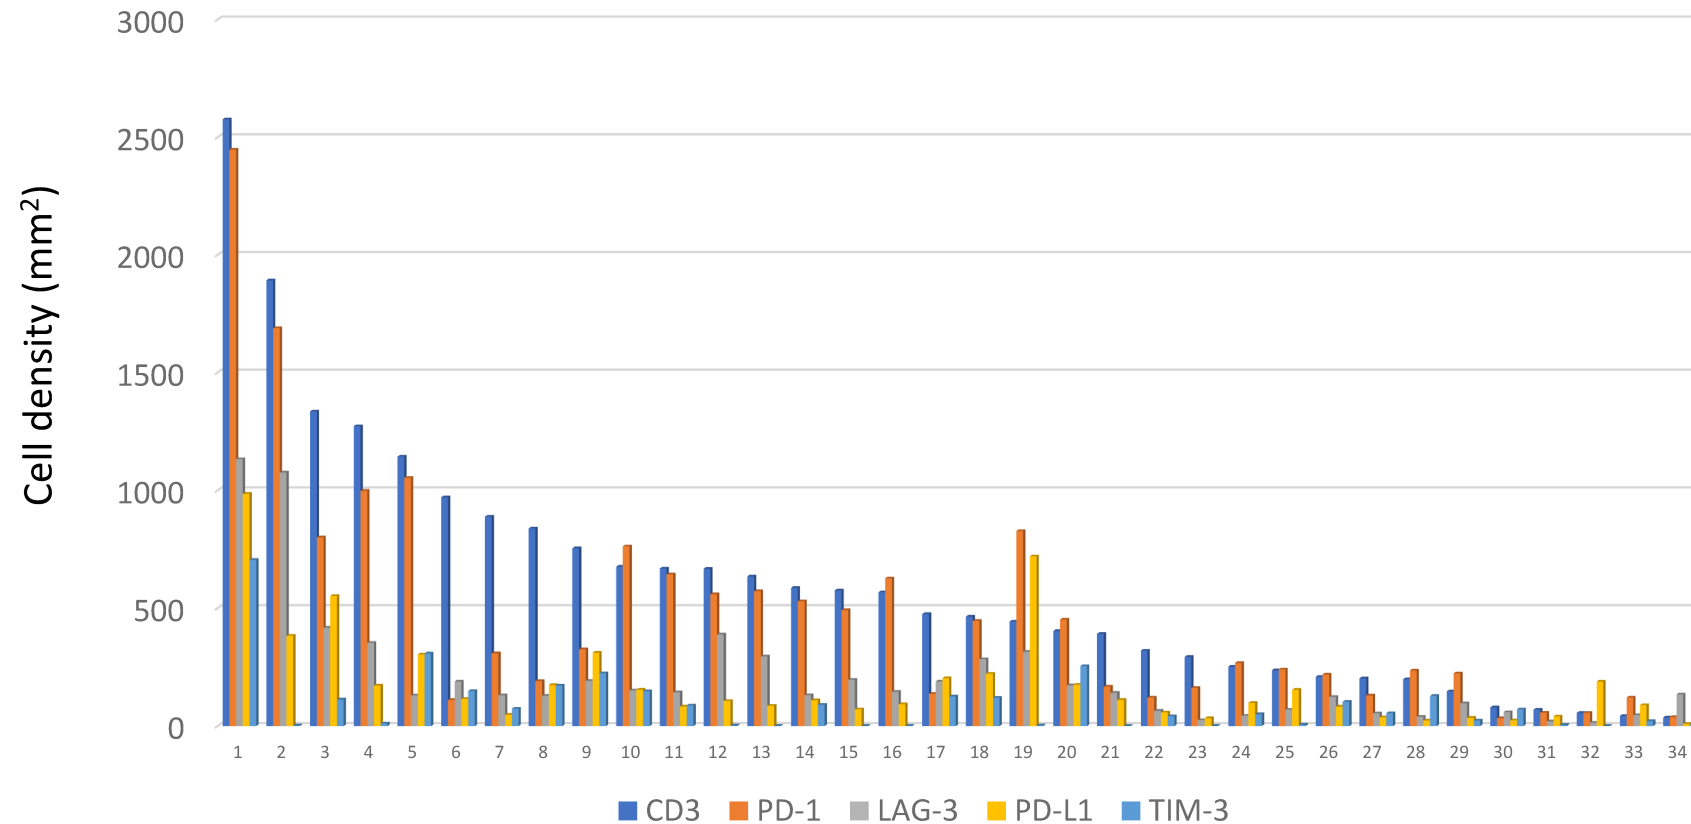

**Figure S2. Correlation of immune cell subset densities and checkpoint marker expression on lymphocytes with degree of T-cell infiltration and with each other.** PD-1+ densities were consistently the highest, followed by LAG-3 and PD-L1, at ~50% and ~35% of the levels observed for PD-1, respectively. Each set of bars represents an individual specimen. Cases demonstrating constitutive component of checkpoint expression are graphically distinct, e.g. PD-1 and PD-L1 densities are higher than CD3 densities as is seen in specimens such as 16, 19, and 32.

## Supplemental Figure S3.

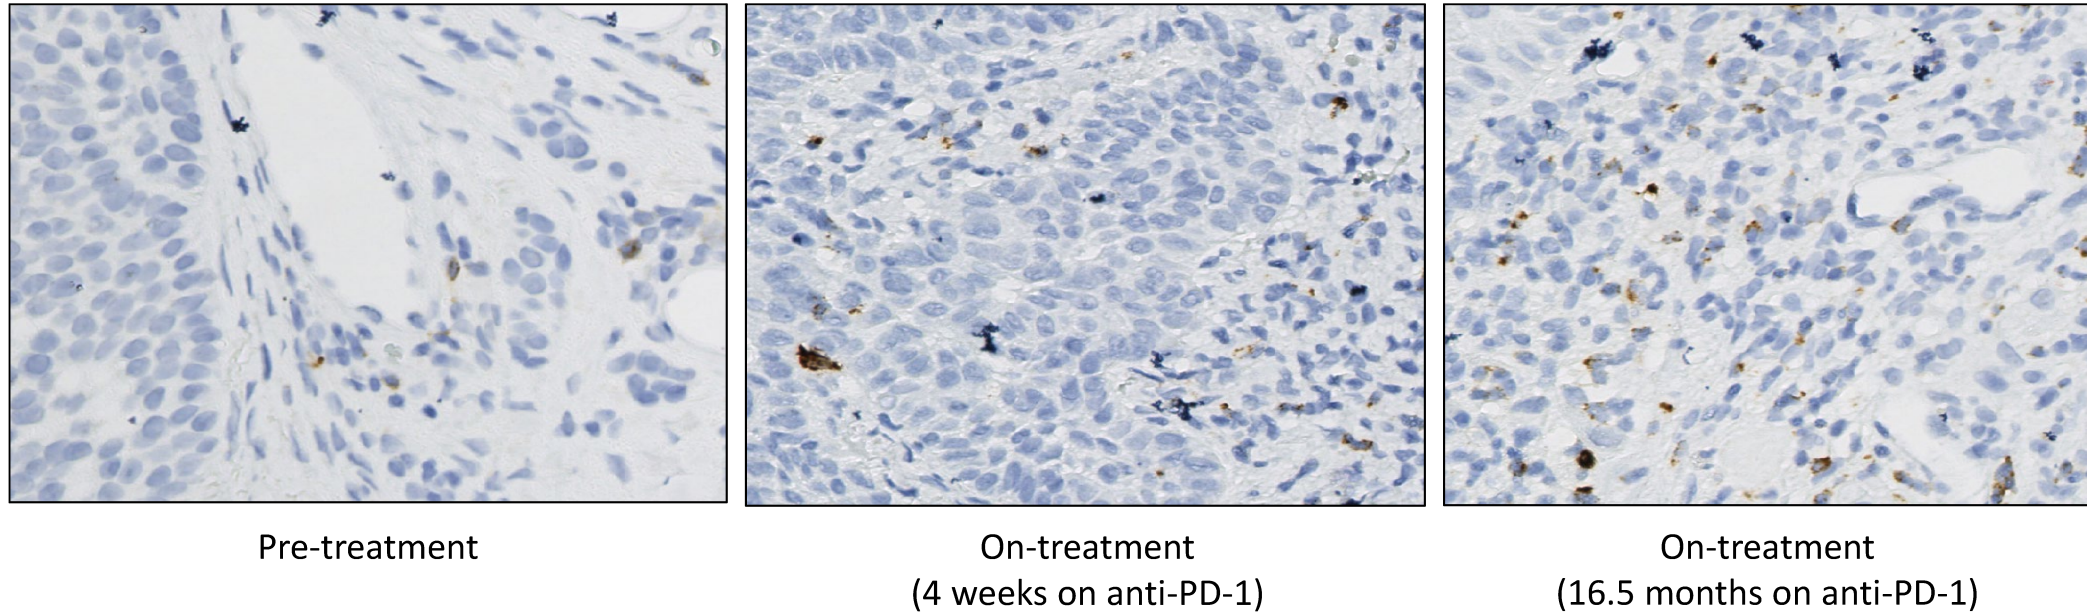

**Figure S3.** IHC for LAG-3 performed on serial biopsies from this patient (pre-treatment, 4 weeks on-treatment, and 16.5 months after the first dose of anti-PD-1) showed 1%, 5%, and 10% expression in ICs, respectively. This graduated increase in LAG-3 checkpoint expression after anti-PD-1 therapy lends support for coordinated immunosuppression.
